# Supplementary material
Source: PubMed Central journal article supplement (PMC2869557)
Supplement: blood-2009-10-248997_2.pdf [file blood-2009-10-248997_2.pdf]

| SNP ID     | Alleles | Chromosome | Position†   | $\chi^2$ value | mHAg-associated allele | Concordance            |                        |
|------------|---------|------------|-------------|----------------|------------------------|------------------------|------------------------|
|            |         |            |             |                |                        | mHAg <sup>+</sup> pool | mHAg <sup>-</sup> pool |
| rs7958311  | A / G   | 12         | 120,068,075 | 40.0356        | A                      | 27 / 27                | 34 / 44                |
| rs3901778  | C / T   | 8          | 129,182,638 | 21.6117        | C                      | 22 / 28                | 34 / 44                |
| rs9449502  | C / G   | 6          | 83,346,563  | 19.0907        | G                      | 13 / 27                | 42 / 44                |
| rs10515461 | A / G   | 5          | 133,094,212 | 19.0487        | A                      | 12 / 28                | 43 / 44                |
| rs9443987  | C / T   | 6          | 83,346,508  | 18.6378        | C                      | 13 / 27                | 41 / 43                |
| rs6904410  | C / T   | 6          | 83,342,419  | 18.6378        | C                      | 13 / 27                | 41 / 43                |
| rs1926218  | A / G   | 10         | 9,878,529   | 18.4831        | A                      | 20 / 28                | 35 / 44                |
| rs10508386 | C / T   | 10         | 9,878,244   | 18.4831        | T                      | 20 / 28                | 35 / 44                |
| rs13120367 | C / G   | 4          | 140,167,214 | 18.3024        | C                      | 20 / 22                | 24 / 36                |
| rs9449507  | C / T   | 6          | 83,358,861  | 18.2006        | C                      | 12 / 28                | 41 / 42                |
| rs9344288  | A / T   | 6          | 83,347,699  | 18.1993        | T                      | 13 / 28                | 42 / 44                |
| rs9353089  | C / T   | 6          | 83,341,671  | 18.1993        | T                      | 13 / 28                | 42 / 44                |
| rs16885899 | A / G   | 6          | 83,339,411  | 18.1993        | A                      | 13 / 28                | 42 / 44                |
| rs9353088  | A / T   | 6          | 83,339,132  | 18.1993        | A                      | 13 / 28                | 42 / 44                |
| rs884966   | C / T   | 8          | 22,633,624  | 18.0673        | T                      | 22 / 28                | 32 / 44                |
| rs4810292  | A / G   | 20         | 38,320,998  | 18.0601        | G                      | 25 / 28                | 27 / 44                |
| rs11139987 | C / T   | 9          | 83,084,037  | 18.0156        | T                      | 26 / 28                | 25 / 44                |
| rs10867960 | C / T   | 9          | 83,080,982  | 18.0156        | C                      | 26 / 28                | 25 / 44                |
| rs2282340  | A / G   | 1          | 53,263,086  | 17.49          | A                      | 20 / 27                | 33 / 43                |
| rs7980783  | A / G   | 12         | 52,420,558  | 17.4443        | G                      | 17 / 28                | 38 / 44                |
| rs7131877  | C / T   | 12         | 52,413,780  | 17.4443        | C                      | 17 / 28                | 38 / 44                |
| rs2077285  | A / C   | 12         | 52,401,190  | 17.4443        | C                      | 17 / 28                | 38 / 44                |
| rs7857822  | A / G   | 9          | 83,087,257  | 17.3341        | A                      | 25 / 27                | 25 / 44                |
| rs11139986 | A / C   | 9          | 83,083,507  | 17.3341        | A                      | 25 / 27                | 25 / 44                |
| rs12799513 | A / G   | 11         | 125,842,646 | 17.2365        | A                      | 14 / 28                | 40 / 43                |
| rs2579274  | A / G   | 12         | 20,001,529  | 16.8779        | G                      | 24 / 28                | 28 / 44                |
| rs4597482  | C / T   | 2          | 168,996,844 | 16.8779        | T                      | 24 / 28                | 28 / 44                |
| rs9344287  | C / T   | 6          | 83,338,725  | 16.8266        | C                      | 12 / 27                | 42 / 44                |
| rs4147221  | C / T   | 6          | 83,340,609  | 16.8266        | T                      | 12 / 27                | 42 / 44                |
| rs17140964 | C / T   | 16         | 6,688,923   | 16.8132        | C                      | 13 / 27                | 37 / 39                |
| rs2309628  | C / T   | 4          | 27,467,214  | 16.7457        | T                      | 14 / 27                | 37 / 40                |
| rs11256364 | A / G   | 10         | 9,948,681   | 16.6976        | A                      | 20 / 28                | 34 / 44                |
| rs17107864 | C / T   | 1          | 53,256,828  | 16.6976        | T                      | 20 / 28                | 34 / 44                |
| rs10508381 | A / G   | 10         | 10,003,640  | 16.6976        | G                      | 20 / 28                | 34 / 44                |
| rs10123088 | C / T   | 9          | 83,160,526  | 16.6896        | T                      | 17 / 26                | 35 / 42                |
| rs11139984 | A / C   | 9          | 83,078,585  | 16.6461        | A                      | 25 / 27                | 24 / 43                |
| rs11139989 | C / T   | 9          | 83,085,651  | 16.5926        | T                      | 26 / 28                | 23 / 42                |
| rs4860067  | A / T   | 4          | 61,422,109  | 16.5694        | T                      | 10 / 24                | 40 / 41                |
| rs11256339 | C / T   | 10         | 9,866,659   | 16.5542        | T                      | 21 / 27                | 31 / 43                |
| rs8176242  | C / T   | 17         | 38,471,400  | 16.5111        | T                      | 22 / 27                | 30 / 44                |

† dbSNP Build 35
